# Supplementary material for: Intensity and lifetime ratiometric luminescent thermometer based on a Tb(iii) coordination polymer
Source: Royal Society of Chemistry journal article supplement (doi:10.1039/d3dt03555g), 2024-01-01
Supplement: d3dt03555g1.pdf [file d3dt03555g1.pdf]

AUTHOR AND AFFILIATIONS-PROOF

Augusto Iwashita Costa,<sup>a</sup> Rafaela M.R. da Silva,<sup>a</sup> Luckerman D.G. Botelho,<sup>a</sup> Sergio F.N. Coelho,<sup>b</sup> Fernando A. Sigoli,<sup>b</sup> João Honorato,<sup>c</sup> Javier Ellena,<sup>d</sup> Felipe T. Martins,<sup>e</sup> Angelo M. Gomes,<sup>f</sup> Wallace C. Nunes,<sup>g</sup> Francesc Lloret,<sup>h</sup> Miguel Julve<sup>h</sup> and Maria Vanda Marinho.<sup>a\*</sup>

---

<sup>a</sup>*Instituto de Química, Universidade Federal de Alfenas, Campus Santa Clara, Alfenas, MG, 37133-840, Brazil. E-mail: [maria.marinho@unifal-mg.edu.br](mailto:maria.marinho@unifal-mg.edu.br)*

<sup>b</sup>*Instituto de Química, Universidade Estadual de Campinas, Cidade Universitária, Campinas, SP 13083-970, Brazil.*

<sup>c</sup>*Instituto de Química, Universidade de São Paulo, São Paulo, SP 05508-900, Brazil.*

<sup>d</sup>*Instituto de Física de São Carlos, Universidade de São Paulo, São Carlos, SP 13566-590, Brazil.*

<sup>e</sup>*Instituto de Física, Universidade Federal de Goiás, Campus Samambaia, Goiânia, GO 74690-900, Brazil.*

<sup>f</sup>*Instituto de Física, Universidade Federal do Rio de Janeiro, Cidade Universitária, Rio de Janeiro 21941-972, Brazil.*

<sup>g</sup>*Instituto de Física, Universidade Federal Fluminense, Rio de Janeiro, RJ 24210-346, Brazil.*

<sup>h</sup>*Instituto de Ciencia Molecular (ICMol)/Departament de Química Inorgànica, Universitat de Valencia, C/ Catedrático José Beltrán 2, 46980 Paterna, València, Spain.*
