# Supplementary material for: Intensity and lifetime ratiometric luminescent thermometer based on a Tb(iii) coordination polymer
Source: Royal Society of Chemistry journal article supplement (doi:10.1039/d3dt03555g), 2024-01-01
Supplement: d3dt03555g2.pdf [file d3dt03555g2.pdf]

## Intensity and Lifetime Ratiometric Luminescent Thermometer based on a Tb(III) Coordination Polymer

Augusto Iwashita Costa,<sup>a</sup> Rafaela M.R. da Silva,<sup>a</sup> Luckerman D.G. Botelho,<sup>a</sup> Sergio F.N. Coelho,<sup>b</sup> Fernando Sigoli,<sup>b</sup> João H. de Araujo-Neto,<sup>c</sup> Javier Ellena,<sup>c</sup> Felipe T. Martins,<sup>d</sup> Angelo M.S. Gomes,<sup>e</sup> Wallace C. Nunes,<sup>f</sup> Francesc Lloret,<sup>g</sup> Miguel Julve,<sup>g</sup> and Maria Vanda Marinho.<sup>a\*</sup>

<sup>a</sup>Instituto de Química, Universidade Federal de Alfenas, Campus Santa Clara, Alfenas, MG, 37133-840, Brazil.

<sup>b</sup>Instituto de Química, Universidade Estadual de Campinas, Cidade Universitária, Campinas, SP 13083-970, Brazil.

<sup>c</sup>Instituto de Física, Universidade de São Paulo, São Carlos, SP 13566-590, Brazil.

<sup>d</sup>Instituto de Física, Universidade Federal de Goiás, Campus Samambaia, Goiânia, GO 74690-900, Brazil.

<sup>e</sup>Instituto de Física, Universidade Federal do Rio de Janeiro, Cidade Universitária, Rio de Janeiro 21941-972, Brazil

<sup>f</sup>Instituto de Física, Universidade Federal Fluminense, Rio de Janeiro, RJ 24210-346, Brazil.

<sup>g</sup>Instituto de Ciencia Molecular (ICMol)/Departament de Química Inorgànica, Universitat de València, 46980 Paterna, València, Spain.

\*E-mail: [maria.marinho@unifal-mg.edu.br](mailto:maria.marinho@unifal-mg.edu.br)

**Table S1.** Selected data about the coordination networks based on deprotonated forms of the H<sub>4</sub>bttb and H<sub>2</sub>-2,5-pzdc acids in the last decade (2012-2022) and this year (2023)\*

| <b>H<sub>4</sub>bttb</b>                                                                              |                      |                                 |                                                                                       |                        |      |      |
|-------------------------------------------------------------------------------------------------------|----------------------|---------------------------------|---------------------------------------------------------------------------------------|------------------------|------|------|
| Formulae*                                                                                             | Metal Ion/<br>CN     | Experimental<br>Approach        | Coordination<br>mode of the<br>carboxylate group                                      | Database<br>Identifier | Ref. | Year |
| {[Ni-(H <sub>2</sub> bttb)(H <sub>2</sub> O) <sub>2</sub> ] $\cdot$ 2DIOX} <sub>n</sub>               | Ni <sup>II</sup> /6  | Solvothermal<br>100 °C - 4 days | 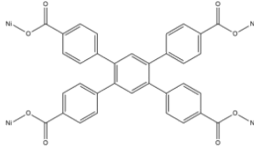   | MIFMIZ                 | 1    | 2013 |
| {[Zn(H <sub>2</sub> bttb)] $\cdot$ 3DEF $\cdot$ 2H <sub>2</sub> O} <sub>n</sub>                       | Zn <sup>II</sup> /6  | Solvothermal<br>100 °C - 4 days |    | MIFBAG,<br>MIFJOC      | 1    | 2013 |
| {[Mg(H <sub>2</sub> bttb)(C <sub>2</sub> H <sub>5</sub> OH) <sub>2</sub> ] $\cdot$ 4DEF} <sub>n</sub> | Mg <sup>II</sup> /6  | Solvothermal<br>100 °C - 4 days |   | MIFBEK,<br>MIFKIX      | 1    | 2013 |
| [M(bttb) <sub>0.5</sub> (DMBPY) <sub>0.5</sub> ] <sub>n</sub>                                         | Co <sup>II</sup> /5  | Solvothermal<br>100 °C - 4 days |  | ONULOA                 | 2    | 2014 |
| [Ce(Hbttb) $\cdot$ (EtOH) <sub>0.28</sub> (H <sub>2</sub> O) <sub>2.75</sub> ] <sub>n</sub>           | Ce <sup>III</sup> /9 | Solvothermal                    |  | FOFCIO                 | 3    | 2014 |

|                                                                                                              |                            |                                            |                                                                                       |        |   |      |
|--------------------------------------------------------------------------------------------------------------|----------------------------|--------------------------------------------|---------------------------------------------------------------------------------------|--------|---|------|
| $[\text{Nd}(\text{Hbttb}) \cdot (\text{EtOH})_{0.28}(\text{H}_2\text{O})_{2.75}]_n$                          | $\text{Nd}^{\text{III}}/9$ | Solvothermal                               | 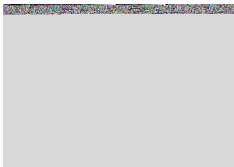   | FOCYUT | 3 | 2014 |
| $\{[\text{Co}_3(\mu_6\text{-bttb})(\mu_4\text{-H}_2\text{bttb})(\text{ade})_2] \cdot \text{H}_2\text{O}\}_n$ | $\text{Co}^{\text{II}}/5$  | Hydrothermal<br>(water)<br>100 °C - 2 days |    | QUFKEJ | 4 | 2015 |
| $(\text{C}_{34}\text{H}_{20}\text{CaO}_8)_n \cdot 2.66(\text{H}_2\text{O})$                                  | $\text{Ca}^{\text{II}}/6$  | -                                          |    | YUNJIC | 5 | 2015 |
| $(\text{C}_{34}\text{H}_{20}\text{CaO}_8)_n$                                                                 | $\text{Ca}^{\text{II}}/6$  | -                                          |    | YUNJOI | 5 | 2015 |
| $(\text{C}_{34}\text{H}_{20}\text{CaO}_8)_n \cdot 1.45(\text{Xe})$                                           | $\text{Ca}^{\text{II}}/6$  | -                                          |   | YUNJUE | 5 | 2015 |
| $(\text{C}_{34}\text{H}_{20}\text{CaO}_8)_n \cdot 0.51(\text{Kr})$                                           | $\text{Ca}^{\text{II}}/6$  | -                                          |  | YUNKAV | 5 | 2015 |

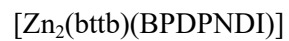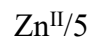

(DMF)  
80 °C –  
24 hr

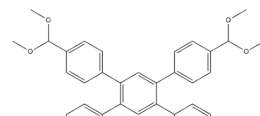

DUNPEJ

6

2015

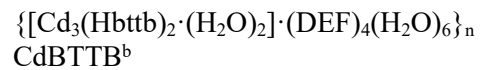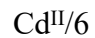

Solvothermal

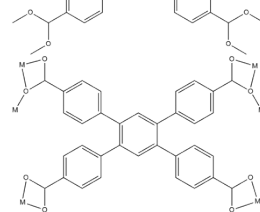

GOSDEZ

7

2015

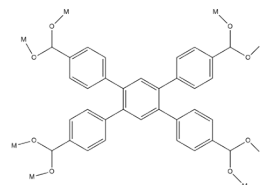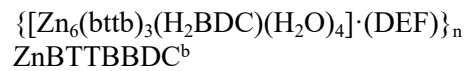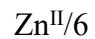

Solvothermal

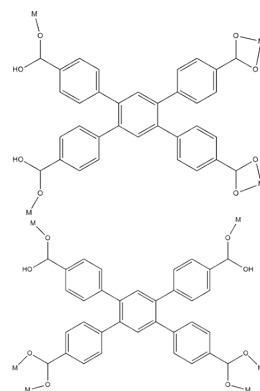

GOSDID

7

2015

|                                                                                                                          |                     |              |  |        |   |      |
|--------------------------------------------------------------------------------------------------------------------------|---------------------|--------------|--|--------|---|------|
| $\{[\text{Co}_2(\text{bttb}) \cdot (\text{BPY})] \cdot (\text{H}_2\text{O})(\text{DEF})_2\}_n$<br>CoBTTBBPY <sup>b</sup> | Co <sup>II</sup> /6 | Solvothermal |  | GOSDOJ | 7 | 2015 |
| $\{[\text{Zn}_2(\text{bttb}) \cdot (\text{BPY})] \cdot (\text{DEF})_2\}_n$<br>ZnBTTBBPY <sup>b</sup>                     | Zn <sup>II</sup> /5 | Solvothermal |  | GOSDUP | 7 | 2015 |
| $\{[\text{Co}_2(\text{bttb}) \cdot (\text{AZPY})] \cdot (\text{DEF})_2\}_n$<br>CoBTTBAZPY <sup>b</sup>                   | Co <sup>II</sup> /6 | Solvothermal |  | GOSFAX | 7 | 2015 |

|                                                                                                                                     |                                                     |                                 |                                                                                       |        |    |      |
|-------------------------------------------------------------------------------------------------------------------------------------|-----------------------------------------------------|---------------------------------|---------------------------------------------------------------------------------------|--------|----|------|
| $\{\text{Cd}_2(\text{bttb})(\text{H}_2\text{O})_5\} \cdot 3\text{H}_2\text{O}\}_n$                                                  | $\text{Cd}^{\text{II}}/4$                           | Solvothermal<br>110 °C - 3 days | 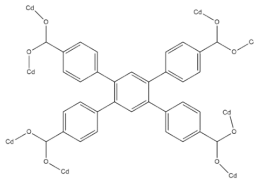   | ESECUC | 8  | 2016 |
| $\{\text{Zn}_2(\text{bttb})\} \cdot 5\text{H}_2\text{O}\}_n$                                                                        | $\text{Zn}^{\text{II}}/4$                           | Solvothermal<br>110 °C - 3 days |    | ESEDAJ | 8  | 2016 |
| $\{\text{Mn}_2(\text{bttb})(\text{H}_2\text{O})_5\} \cdot 2\text{H}_2\text{O}\}_n$                                                  | $\text{Mn}^{\text{II}}/4$                           | Solvothermal<br>130 °C - 3 days |    | ESEDEN | 8  | 2016 |
| $\{\text{Zr}_6(\mu_3\text{-O})_4(\mu_3\text{-OH})_4(\text{OH})_4(\text{H}_2\text{O})_4(\text{bttb})_2\}_n$<br>M-CAU-24 <sup>b</sup> | $\text{Zr}^{\text{IV}}/$<br>$\text{Ce}^{\text{IV}}$ | Stirring<br>100 °C –<br>15 min  |   | IZIBUQ | 9  | 2016 |
| $[\text{Ca}(\text{H}_2\text{bttb})_n \cdot (\text{C}_2\text{H}_2)_{1.76}]$<br>SBMOF-2·C <sub>2</sub> H <sub>2</sub> <sup>b</sup>    | $\text{Ca}^{\text{II}}/6$                           | Solvothermal<br>100 °C - 3 days |  | OKAYOQ | 10 | 2016 |

|                                                                                                                                                    |                           |                                 |                                                                                       |        |    |      |
|----------------------------------------------------------------------------------------------------------------------------------------------------|---------------------------|---------------------------------|---------------------------------------------------------------------------------------|--------|----|------|
| $[\text{Ca}(\text{H}_2\text{bttb})_n \cdot (\text{C}_2\text{H}_4)_{1.47}]$<br>SBMOF-2: $\text{C}_2\text{H}_4^b$                                    | $\text{Ca}^{\text{II}}/6$ | Solvothermal<br>100 °C - 3 days | 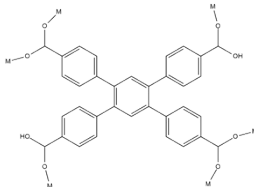   | OKAYUW | 10 | 2016 |
| $[\text{Ca}(\text{H}_2\text{bttb})_n \cdot (\text{C}_2\text{H}_6)_{1.58}]$<br>SBMOF-2: $\text{C}_2\text{H}_6^b$                                    | $\text{Ca}^{\text{II}}/6$ | Solvothermal<br>100 °C - 3 days |    | OKAZAD | 10 | 2016 |
| $\{[\text{Cd}(\text{H}_2\text{bttb})] \cdot 5\text{H}_2\text{O}\}_n$                                                                               | $\text{Cd}^{\text{II}}/8$ | Solvothermal<br>180 °C - 3 days |    | FENHIS | 11 | 2017 |
| $\{[\text{DMA}]_3[\text{Y}_9(\mu_3\text{-O})_2(\mu_3\text{-OH})_{12}(\text{OH})_2(\text{H}_2\text{O})_7(\text{bttb})_3] \cdot (\text{solv})_x\}_n$ | $\text{Y}^{\text{III}}$   | Solvothermal                    |    | HEJFUA | 12 | 2017 |
| Y-shp-MOF-5 <sup>b</sup>                                                                                                                           | $\text{Y}^{\text{III}}$   | Solvothermal                    |   | HEJGAH | 12 | 2017 |
| Y-shp-MOF-5 (0% RH)                                                                                                                                | $\text{Y}^{\text{III}}$   | Solvothermal                    |  | HEJGEL | 12 | 2017 |
| Y-shp-MOF-5 22% humidity                                                                                                                           | $\text{Y}^{\text{III}}$   | Solvothermal                    |  |        |    |      |

|                                                                                                                                                   |                      |                                   |                                                                                     |        |    |      |
|---------------------------------------------------------------------------------------------------------------------------------------------------|----------------------|-----------------------------------|-------------------------------------------------------------------------------------|--------|----|------|
| Y-shp-MOF-5 100% humidity                                                                                                                         | Y <sup>III</sup>     | Solvothermal                      |  | HEJGIP | 12 | 2017 |
| [Zn <sub>2</sub> (bttb)(L2)]·2DMF                                                                                                                 | Zn <sup>II</sup> /5  | Solvothermal<br>80 °C –<br>48 hr  |  | OCINAS | 13 | 2017 |
| [Co <sub>2</sub> (bttb)(L2)(H <sub>2</sub> O)(μ-H <sub>2</sub> O)(DMF)]·2.7DMF                                                                    | Co <sup>II</sup> /6  | Solvothermal<br>80 °C –<br>48 hr  |  | OCINEW | 13 | 2017 |
| [Cd(H <sub>2</sub> bttb)] <sub>n</sub> ·0.5nH <sub>2</sub> O                                                                                      | Cd <sup>II</sup> /8  | Solvothermal<br>180 °C –<br>72 hr |  | FENHIS | 14 | 2018 |
| {[Bi <sub>2</sub> (H <sub>2</sub> bttb)(bttb)(H <sub>2</sub> O) <sub>2</sub> ]·xH <sub>2</sub> O} <sub>n</sub>                                    | Bi <sup>III</sup> /8 | Solvothermal<br>80 °C - 12 hr     |  | MIHMEY | 15 | 2018 |
| {H <sub>2</sub> N(CH <sub>3</sub> ) <sub>2</sub> [Bi(bttb)(H <sub>2</sub> O)]·xH <sub>2</sub> O} <sub>n</sub>                                     | Bi <sup>III</sup> /9 | Solvothermal<br>100 °C - 12 hr    |  | MIHMIC | 15 | 2018 |
| {[Bi <sub>4</sub> (O) <sub>2</sub> (OH) <sub>2</sub> (H <sub>2</sub> bttb)(bttb)(H <sub>2</sub> O) <sub>2</sub> ]·xH <sub>2</sub> O} <sub>n</sub> | Bi <sup>III</sup> /5 | Solvothermal<br>120 °C - 12 hr    |  | MIHMOI | 15 | 2018 |



|                                                                                                              |                            |                                   |                                                                                      |        |    |      |
|--------------------------------------------------------------------------------------------------------------|----------------------------|-----------------------------------|--------------------------------------------------------------------------------------|--------|----|------|
| $[\text{Ca}(\text{bttb})_n \cdot 1.2n(\text{I}_2)]$<br>$\text{I}_2@\text{SBMOF-2}^{\text{b}}$                | $\text{Ca}^{\text{II}}/6$  | Solvothermal                      | 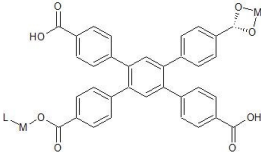  | OFOQUY | 16 | 2018 |
| $\{[\text{Co}(\text{bttb})_{0.5}(\text{H}_2\text{O})]\cdot\text{DMF}\}_n$                                    | $\text{Co}^{\text{II}}/6$  | Solvothermal<br>85 °C - 4 days    |   | FIYDEZ | 17 | 2019 |
| $[\text{C}_{34}\text{O}_8\text{H}_{18}]_3(\text{F}/\text{OH})_6(\text{H}_2\text{O})_{18}(\text{NpO}_2)_{18}$ | $\text{Np}^{\text{V}}/7$   | Solvothermal<br>130 °C –<br>72 hr |   | VOPGAL | 18 | 2019 |
| $[\text{Sc}_2(\text{OH})_2(\text{bttb})]$                                                                    | $\text{Sc}^{\text{III}}/6$ | Solvothermal<br>170 °C –<br>48 hr |   | SUMBAG | 19 | 2020 |
| $\{\text{Zn}(\text{cyclam})(\text{H}_2\text{bttb})(\text{DMF})_2\}_n$<br>IRH-5-as synthesized <sup>b</sup>   | $\text{Zn}^{\text{II}}/6$  | Solvothermal<br>90 °C - 3 days    |  | ATICEO | 20 | 2021 |

|                                                                                                            |                            |                                   |                                                                                       |        |    |      |
|------------------------------------------------------------------------------------------------------------|----------------------------|-----------------------------------|---------------------------------------------------------------------------------------|--------|----|------|
| $\{\text{Cu}(\text{cyclam})(\text{H}_2\text{bttb})(\text{DMF})_2\}_n$<br>IRH-4-as synthesized <sup>b</sup> | $\text{Cu}^{\text{II}}/6$  | Solvothermal<br>90 °C - 3 days    | 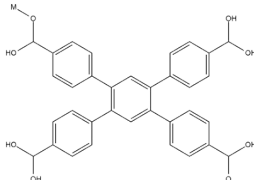   | ATICUE | 20 | 2021 |
| IRH-5-dichloromethane <sup>b</sup>                                                                         | $\text{Zn}^{\text{II}}/6$  | Solvothermal<br>90 °C - 3 days    |    | ATIBUD | 20 | 2021 |
| IRH-5-activated <sup>b</sup>                                                                               | $\text{Zn}^{\text{II}}/6$  | Solvothermal<br>90 °C - 3 days    |    | ATICAK | 20 | 2021 |
| IRH-4-activated <sup>b</sup>                                                                               | $\text{Cu}^{\text{II}}/6$  | Solvothermal<br>90 °C - 3 days    |    | ATICIS | 20 | 2021 |
| IRH-4-dichloromethane <sup>b</sup>                                                                         | $\text{Cu}^{\text{II}}/6$  | Solvothermal<br>90 °C - 3 days    |   | ATICOY | 20 | 2021 |
| $[\text{In}_2(\text{bttb})(\text{OH})_2]$                                                                  | $\text{In}^{\text{III}}/6$ | Solvothermal<br>100 °C –<br>48 hr |  | ODAXEA | 21 | 2021 |

|                                                                                                                                                                                                  |                                                          |                                                                           |                                                                                     |        |    |      |
|--------------------------------------------------------------------------------------------------------------------------------------------------------------------------------------------------|----------------------------------------------------------|---------------------------------------------------------------------------|-------------------------------------------------------------------------------------|--------|----|------|
| $[\text{Ce}(\text{Hbttb})(\text{PO})]_n$                                                                                                                                                         | $\text{Ce}^{\text{III}}$                                 | Solvothermal<br>120°C- 2 days/<br>Loading with<br>propylene oxide<br>(PO) | 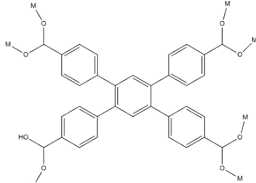 | LARPAZ | 22 | 2022 |
| $\{[(\text{Yb}_6(\mu_3\text{-OH}^-)_8(\text{H}_2\text{O})_4(\text{OH}^-)_2)[(\text{Nd}_6(\mu_3\text{-OH}^-)_4(\mu_3\text{-O})_2(\text{H}_2\text{O})_6(\text{OH}^-)_2)]\}$<br>$\text{YbNdTCPB}^b$ | $\text{Yb}^{\text{III}}/7$<br>$\text{Nd}^{\text{III}}/6$ | 115 °C -<br>18 hr                                                         |  | GIHVUS | 23 | 2022 |
| $\{[(\text{CH}_3)_2\text{NH}_2][\text{Eu}(\text{bttb})(\text{H}_2\text{O})_2] \cdot \text{DMF}\}_n$                                                                                              | $\text{Eu}^{\text{III}}/8$                               | Solvothermal<br>120 °C - 3 days                                           |  | JIFDUB | 24 | 2023 |

<sup>a</sup>Abbreviations: CN: coordination number;  $\text{H}_4\text{bttb}$  = 1,2,4,5-tetrakis(4'-carboxyphenyl)benzene; DIOX = dioxane, DMF = dimethylformamide; DMBPY: 2,2'-dimethyl-4,4'-bipyridine; DEF = N,N'-diethylformamide; PO = propylene oxide; DMA = dimethylammonium cation, solv = solvent; cyclam = 1,4,8,11-tetraazacyclotetradecane; BDC = 1,4-benzenedicarboxylic acid; BPY = bipyridine; AZPY = azopyridine; IRH = Institut de Recherche sur l'Hydrogène; shp = square hexagonal-prism; RH = relative humidity; L2 = 1,7-bis((pyridin-4'-yl)methanol)-1,7-dicarba-closododecaboranes; CAU = Christian-Albrechts-University; BDPNDI = N,N'-bis(4-pyridyl)-2,6-dipyrrolidyl naphthalenediimide. <sup>b</sup>: as denoted in the reference paper.

## H<sub>2</sub>-2,5-pzdc

| Formulae <sup>*a</sup>                                                 | Metal Ion/CN         | Experimental Approach           | Coordination mode of the carboxylate group                                           | Database Identifier | Ref. | Year |
|------------------------------------------------------------------------|----------------------|---------------------------------|--------------------------------------------------------------------------------------|---------------------|------|------|
| [Ce(2,5-pzdc) <sub>1.5</sub> (H <sub>2</sub> O)] <sub>n</sub>          | Ce <sup>III</sup> /9 | Solvothermal<br>160 °C - 3 days | 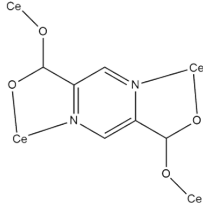  | NATXEN              | 25   | 2012 |
| {[Er(2,5-pzdc)(μ-OH)(H <sub>2</sub> O)]·H <sub>2</sub> O} <sub>n</sub> | Er <sup>III</sup> /8 | Solvothermal<br>160 °C - 3 days |  | NATXIR              | 25   | 2012 |

|                                                                                                                           |                             |                                    |                                                                                      |        |    |      |
|---------------------------------------------------------------------------------------------------------------------------|-----------------------------|------------------------------------|--------------------------------------------------------------------------------------|--------|----|------|
| $\{[\text{Tm}(2,5\text{-pzdc})_{1.5}(\mu_4(\text{H}_2\text{O})_2) \cdot 3\text{H}_2\text{O}]\}_n$                         | $\text{Tm}^{\text{III}}/9$  | Solvothermal -<br>150 °C-1 day     | 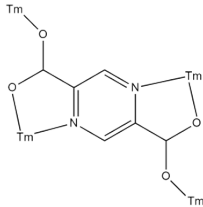  | FEDBEX | 26 | 2012 |
| $\{[\text{La}(2,5\text{-pzdc})(\text{NO}_3)(\text{H}_2\text{O})_2] \cdot 2.33\text{H}_2\text{O}\}_n$                      | $\text{La}^{\text{II}}/10$  | Mechanochemical<br>150 °C - 3 days |   | BUSSAL | 27 | 2015 |
| $\{[\text{Ce}(2,5\text{-pzdc})(\text{NO}_3)(\text{H}_2\text{O})_2] \cdot 2.33\text{H}_2\text{O}\}_n$                      | $\text{Ce}^{\text{III}}/10$ | Mechanochemical<br>150 °C - 3 days |   | -      | 27 | 2015 |
| $\{[\text{Pr}_9(2,5\text{-pzdc})_9(\text{NO}_3)_2(\text{H}_2\text{O})_{25}(\text{NO}_3)_7 \cdot 8\text{H}_2\text{O}]\}_n$ | $\text{Pr}^{\text{III}}/9$  | Mechanochemical;<br>130 °C-3 days  |  | BUSTAM | 27 | 2015 |

|                                                                                                                           |                            |                                       |                                                                                     |        |    |      |
|---------------------------------------------------------------------------------------------------------------------------|----------------------------|---------------------------------------|-------------------------------------------------------------------------------------|--------|----|------|
| $\{[\text{Nd}_9(2,5\text{-pzdc})_9(\text{NO}_3)_2(\text{H}_2\text{O})_{25}](\text{NO}_3)_7 \cdot 8\text{H}_2\text{O}\}_n$ | $\text{Nd}^{\text{III}}/9$ | Mechanochemical;<br>130 °C-3 days     | 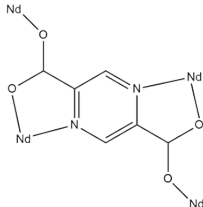 | BUSSEP | 27 | 2015 |
| $\{[\text{Nd}_6(2,5\text{-pzdc})_8(\text{H}_2\text{O})_{10}] (\text{NO}_3)_2 \cdot 2\text{H}_2\text{O}\}_n$               | $\text{Nd}^{\text{III}}/9$ | Mechanochemical;<br>150-170 °C-3 days |  | BUSSIT | 27 | 2015 |
| $\{[\text{Sm}_6(2,5\text{-pzdc})_8(\text{H}_2\text{O})_{10}] (\text{NO}_3)_2 \cdot 2\text{H}_2\text{O}\}_n$               | $\text{Sm}^{\text{III}}/9$ | Mechanochemical;<br>150-170 °C-3 days |  | -      | 27 | 2015 |

|                                                                                          |                            |                                    |                                                                                      |        |    |      |
|------------------------------------------------------------------------------------------|----------------------------|------------------------------------|--------------------------------------------------------------------------------------|--------|----|------|
| $[\text{Eu}(2,5\text{-pzdc})(\text{NO}_3)(\text{H}_2\text{O})]_n$                        | $\text{Eu}^{\text{III}}/9$ | Mechanochemical;<br>180 °C-3 days  | 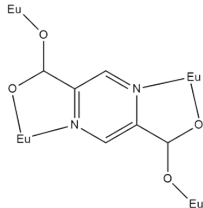  | BUSOZ  | 27 | 2015 |
| $[\text{Gd}(2,5\text{-pzdc})(\text{NO}_3)(\text{H}_2\text{O})]_n$                        | $\text{Gd}^{\text{II}}/9$  | Mechanochemical;<br>180 °C- 3 days |   | -      | 27 | 2015 |
| $[\text{Tb}(2,5\text{-pzdc})(\text{NO}_3)(\text{H}_2\text{O})]_n$                        | $\text{Tb}^{\text{III}}/9$ | Mechanochemical;<br>180 °C- 3 d    |   | BUSSUF | 27 | 2015 |
| $\{[\text{Ce}_2(2,5\text{-pzdc})_3(\text{H}_2\text{O})_4] \cdot 6\text{H}_2\text{O}\}_n$ | $\text{Ce}^{\text{III}}/9$ | Hydrothermal<br>170 °C - 3 days    |  | VASFAZ | 28 | 2017 |

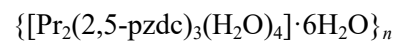

$\text{Pr}^{\text{III}}/9$

Hydrothermal  
170 °C - 3 days

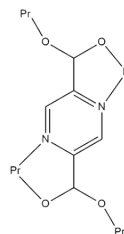

VASFED

28

2017

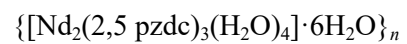

$\text{Nd}^{\text{III}}/9$

Hydrothermal  
170 °C - 3 days

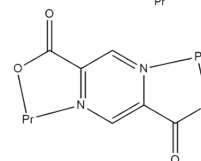

VASFON

28

2017

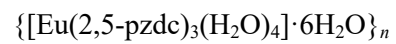

$\text{Eu}^{\text{III}}/9$

Hydrothermal  
170 °C - 3 days

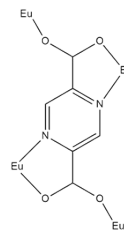

VASFUT

28

2017



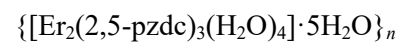 $\text{Er}^{\text{III}}/9$ 

Hydrothermal  
170 °C - 3 days

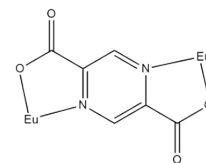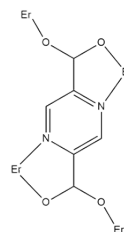

VASFIH

28

2017

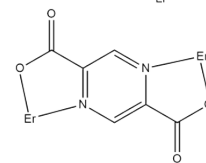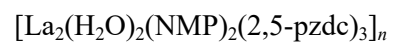 $\text{La}^{\text{III}}/9$ 

Solvothermal  
100 °C - 1 day

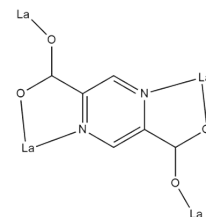

ZUZKAJ

29

2020

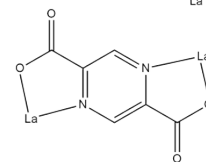

|                                                                          |                            |                                |                                                                                       |   |    |      |
|--------------------------------------------------------------------------|----------------------------|--------------------------------|---------------------------------------------------------------------------------------|---|----|------|
| $[\text{Ce}_2(\text{H}_2\text{O})_2(\text{NMP})_2(2,5\text{-pzdc})_3]_n$ | $\text{Ce}^{\text{II}}/9$  | Solvothermal<br>100 °C - 1 day | 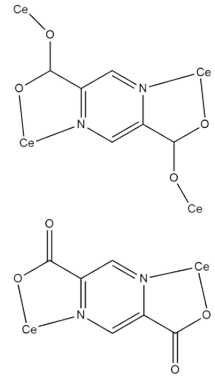   | - | 29 | 2020 |
| $[\text{Pr}_2(\text{H}_2\text{O})_2(\text{NMP})_2(2,5\text{-pzdc})_3]_n$ | $\text{Pr}^{\text{III}}/9$ | Solvothermal<br>100 °C - 1 day |   | - | 29 | 2020 |
| $[\text{Nd}_2(\text{H}_2\text{O})_2(\text{NMP})_2(2,5\text{-pzdc})_3]_n$ | $\text{Nd}^{\text{III}}/9$ | Solvothermal<br>100 °C - 1 day |  | - | 29 | 2020 |

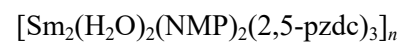 $\text{Sm}^{\text{III}}/9$ 

Solvothermal  
100 °C - 1 day

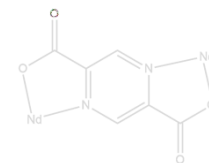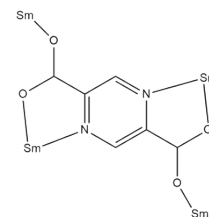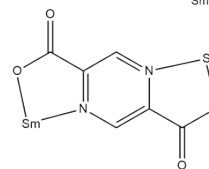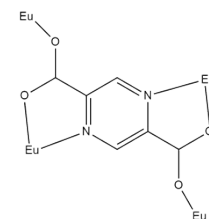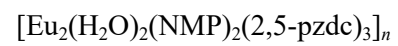 $\text{Eu}^{\text{III}}/9$ 

Solvothermal  
100 °C - 1 day

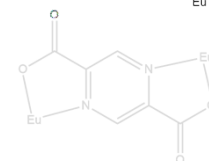

-

29

2020

-

29

2020

|                                                                                                        |                            |                                |                                                                                       |   |    |      |
|--------------------------------------------------------------------------------------------------------|----------------------------|--------------------------------|---------------------------------------------------------------------------------------|---|----|------|
| $[\text{Gd}_2(\text{H}_2\text{O})_2(\text{NMP})_2(2,5\text{-pzdc})_3]_n$                               | $\text{Gd}^{\text{III}}/9$ | Solvothermal<br>100 °C -1 day  | 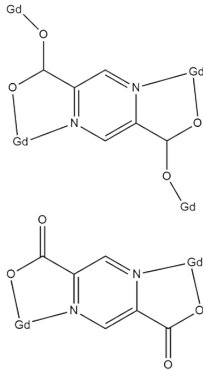   | - | 29 | 2020 |
| $\{[\text{Tb}_2(\text{H}_2\text{O})_4(2,5\text{-pzdc})_3]\cdot\text{NMP}\cdot 5\text{H}_2\text{O}\}_n$ | $\text{Tb}^{\text{III}}/9$ | Solvothermal<br>100 °C - 1 day |    | - | 29 | 2020 |
| $\{[\text{Er}_2(\text{H}_2\text{O})_4(2,5\text{-pzdc})_3]\cdot\text{NMP}\cdot 5\text{H}_2\text{O}\}_n$ | $\text{Er}^{\text{III}}/9$ | Solvothermal<br>100 °C - 1 day |  | - | 29 | 2020 |

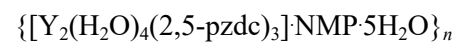 $Y^{\text{III}}/9$ 

Solvothermal  
100 °C - 1 day

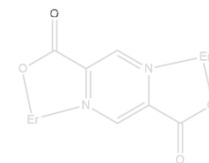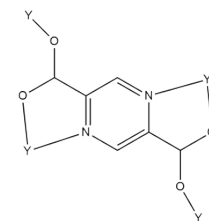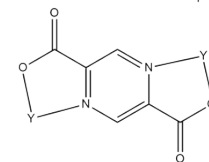

ZUZKEN

29

2020

\*The revision for 2,5-pzdc<sup>2-</sup> involved only coordination compounds with Ln<sup>III</sup> ions. <sup>a</sup>Abbreviations: H<sub>2</sub>-2,5-pzdc = 2,5-pyrazinedicarboxylic acid; NMP = *N*-methyl-2-pyrrolidone.

**Table S2.** Main bond distances (Å) and angles (deg) for **1\***

|                                            |            |                                           |            |
|--------------------------------------------|------------|-------------------------------------------|------------|
| Tb1-O1                                     | 2.356(2)   | Tb1- O5 <sup>iv</sup>                     | 2.517(2)   |
| Tb1- O1 <sup>ii</sup>                      | 2.383(2)   | Tb1- O6 <sup>iv</sup>                     | 2.358(3)   |
| Tb1-O3                                     | 2.279(3)   | Tb1-N1                                    | 2.624(3)   |
| Tb1- O4 <sup>i</sup>                       | 2.305(3)   | Tb1-Tb1 <sup>i</sup>                      | 3.7557(2)  |
| Tb1- O5 <sup>iii</sup>                     | 2.381(2)   | Tb1- Tb1 <sup>ii</sup>                    | 3.7557(2)  |
| O1 -Tb1 - O1 <sup>i</sup>                  | 157.70(6)  | O3 -Tb1 - O5 <sup>iii</sup>               | 119.20(12) |
| O1 -Tb1 - O5 <sup>iii</sup>                | 132.79(8)  | O3 -Tb1 - O5 <sup>iv</sup>                | 73.60(11)  |
| O1 -Tb1 - O5 <sup>iv</sup>                 | 71.84(8)   | O3 -Tb1 - O6 <sup>iii</sup>               | 73.16(12)  |
| O1 <sup>1</sup> -Tb1 - O5 <sup>iii</sup>   | 69.01(7)   | O3 -Tb1 - N1                              | 124.01(11) |
| O1 -Tb1 - O6 <sup>iii</sup>                | 99.56(11)  | O4 <sup>i</sup> -Tb1 - O1 <sup>i</sup>    | 95.49(11)  |
| O1 <sup>i</sup> -Tb1 - N1                  | 132.13(8)  | O4 <sup>i</sup> -Tb1 - O5 <sup>iii</sup>  | 100.30(11) |
| O1 -Tb1 - N1                               | 65.00(8)   | O4 <sup>i</sup> -Tb1 - O5 <sup>iv</sup>   | 70.57(10)  |
| O3 -Tb1 - O1 <sup>i</sup>                  | 98.00(11)  | O4 <sup>i</sup> -Tb1 - O6 <sup>iii</sup>  | 140.43(13) |
| O3 -Tb1 - O1                               | 76.02(12)  | O5 <sup>iv</sup> -Tb1 - O1 <sup>i</sup>   | 85.87(8)   |
| O3 -Tb1 - O4 <sup>i</sup>                  | 140.50(14) | O5 <sup>iv</sup> -Tb1 - O5 <sup>iii</sup> | 152.64(7)  |
| O6 <sup>iii</sup> -Tb1 - O5 <sup>iv</sup>  | 146.76(10) | O5 <sup>iii</sup> -Tb1 - N1               | 70.68(8)   |
| O6 <sup>iii</sup> -Tb1 - O5 <sup>iii</sup> | 52.81(9)   | O6 <sup>iii</sup> -Tb1 - O1 <sup>i</sup>  | 99.13(12)  |
| O6 <sup>iii</sup> -Tb1 - N1                | 75.46(13)  | O1 -Tb1 - Tb1 <sup>i</sup>                | 156.01(6)  |

\*Symmetry codes: (i) =  $-x + 3/2, y + 1/2, -z + 1/2$ ; (ii) =  $-x + 3/2, y - 1/2, -z + 1/2$ ;  
(iii) =  $-x + 3/2, -y + 1/2, -z + 1$ ; (iv) =  $x, -y, z - 1/2$ ; (v) =  $-x + 3/2, -y + 1/2, -z$ ; (vi) =  $-x + 1,$   
 $-y + 1, -z + 1$ ; (vii) =  $x, -y, z + 1/2$ .

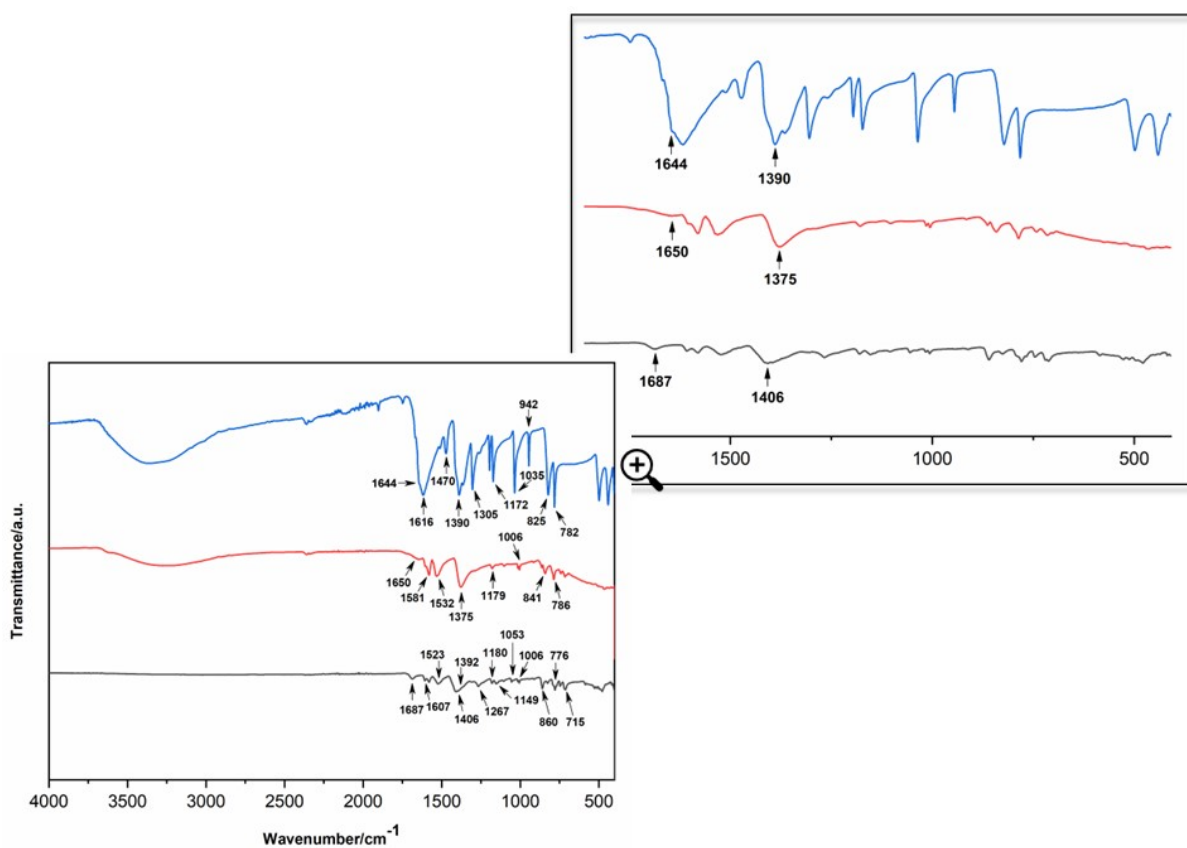

**Figure S1.** FTIR spectra of **1** (black trace),  $\text{Na}_4\text{bttb}$  (red trace), and  $\text{Na}_{2,5}\text{-pzdc}$  salt (blue trace). The amplification shows the  $\nu_{\text{as}}(\text{COO}^-)$  and  $\nu_{\text{s}}(\text{COO}^-)$  stretching vibrations of the carboxylate groups aiming at getting a better visualization of  $\Delta\nu$  in  $\text{cm}^{-1}$ .

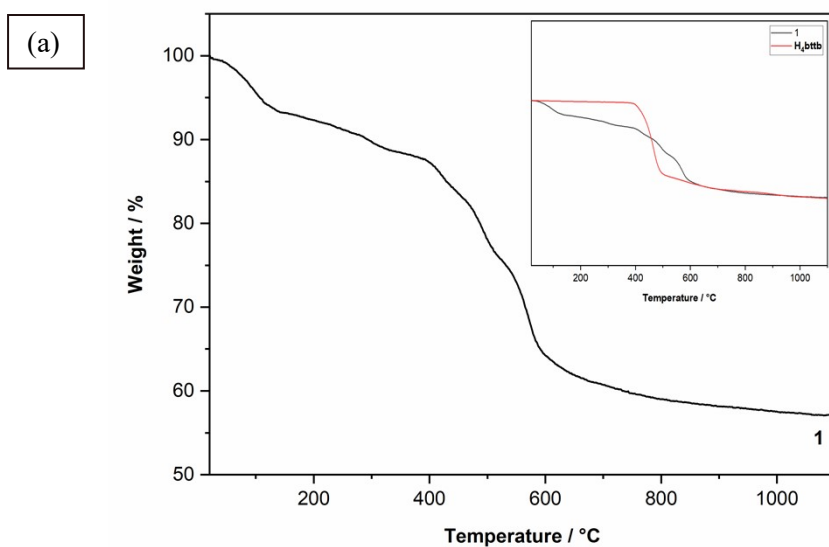

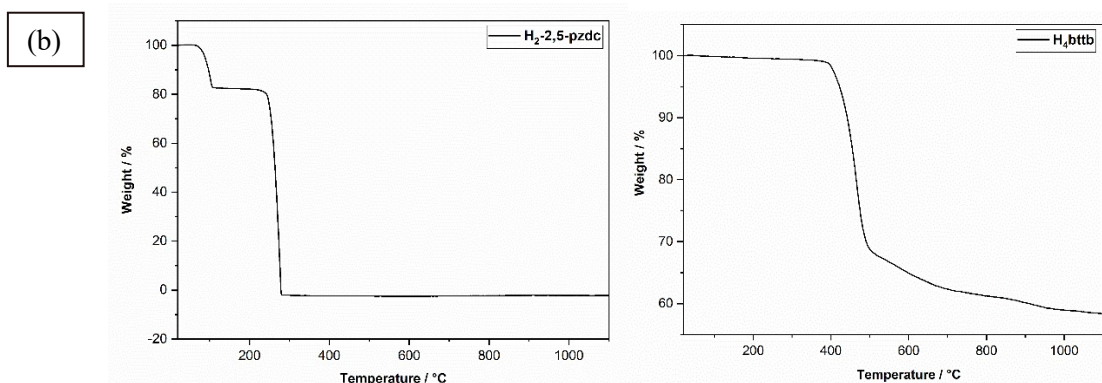

**Figure S2.** (a) TGA curve for **1** and TGA curves of **1** and H<sub>4</sub>btbtb (inside); (b) TGA curves for H<sub>2</sub>-2,5-pzdc and H<sub>4</sub>btbtb acids.

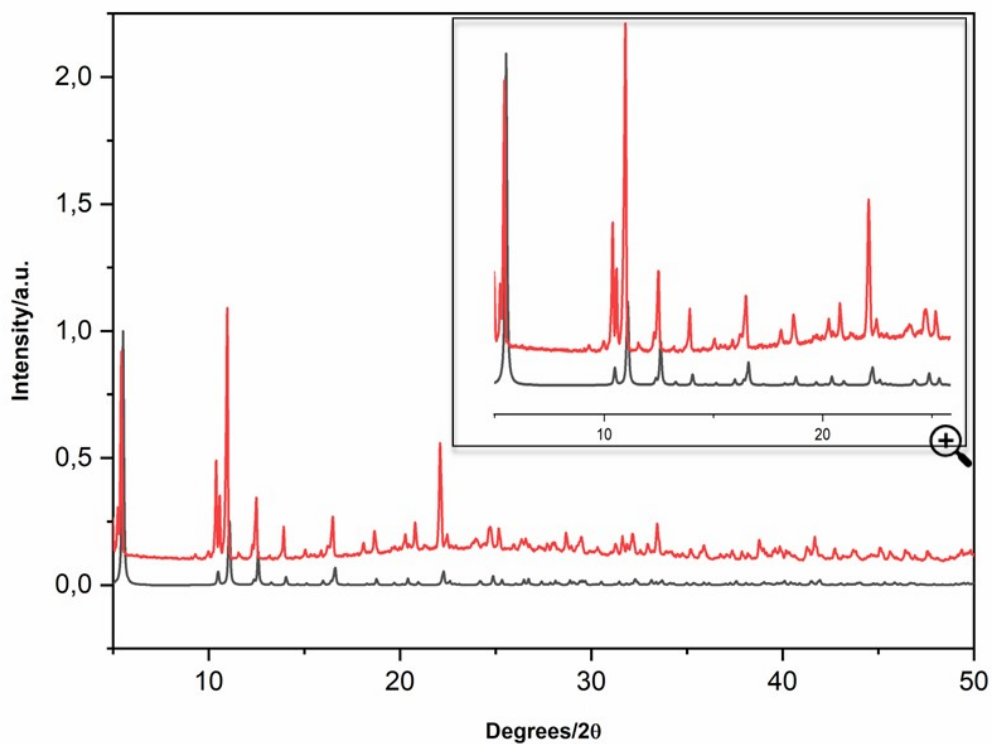

**Figure S3.** Experimental (red) and calculated (black) PXR D patterns for **1**. The inset shows an overlay between the patterns for a better comparison.



## SHAPE details

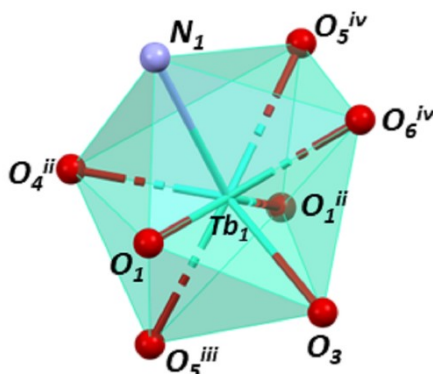

**Figure S4.** Distorted triangular dodecahedron geometry around the Tb<sup>III</sup> center in **1**. *Symmetry code:* (ii) =  $-x + 3/2, y - 1/2, -z + 1/2$ ; (iii)  $-x + 3/2, -y + 1/2, -z + 1$ ; (iv) =  $x, -y, z - 1/2$ .

**Table S3.** Geometric analysis of the coordination environment of the terbium(III) ion in **1**, showing the site symmetry approximation derived from continuous shape measures (CShM; via SHAPE<sup>30</sup>).

| Label   | Symmetry        | Shape                          | CShM* |
|---------|-----------------|--------------------------------|-------|
| TDD-8   | D <sub>2d</sub> | Triangular dodecahedron        | 3.162 |
| BTPR-8  | C <sub>2v</sub> | Biaugmented trigonal prism     | 3.696 |
| JBTPR-8 | C <sub>2v</sub> | Biaugmented trigonal prism J50 | 3.796 |
| SAPR-8  | D <sub>4d</sub> | Square antiprism               | 5.324 |

\*The approach is incorporated into the program SHAPE, which is readily available for public use<sup>30</sup>. The values of SHAPE measures relative to other reference polyhedra of **1** are significantly larger. The lower limit corresponds to structures that exactly match the shape of symmetry, and increasing values result in increasingly distorted structures.<sup>31</sup>

Each Tb<sup>III</sup> ion in **1** is eight-coordinated and its environment has been evaluated as a triangular dodecahedron with a CShM value of 3.162 (Table S3). This geometry also was

observed in the compound  $[\text{Dy}_4(\text{HL})_2(\mu_3\text{-OH})_2(\text{piv})_4(\text{MeOH})_2]\cdot 4\text{MeOH}\cdot 2\text{H}_2\text{O}$  (for Dy2) and  $[\text{Dy}_{21}(\text{L})_7(\text{HL})_7(\text{tfa})_7]\text{Cl}_7\cdot 15\text{H}_2\text{O}\cdot 7\text{MeOH}\cdot 12\text{CHCl}_3$  (for Dy7)

( $\text{H}_4\text{L}$  = 6-((bis(2-hydroxyethyl)amino)methyl)-*N'*-((8-hydroxyquinolin-2-yl)methylene)picolinohydrazide; piv = pivalate); tfa = 1,1,1-trifluoroacetylacetonate).<sup>32</sup>

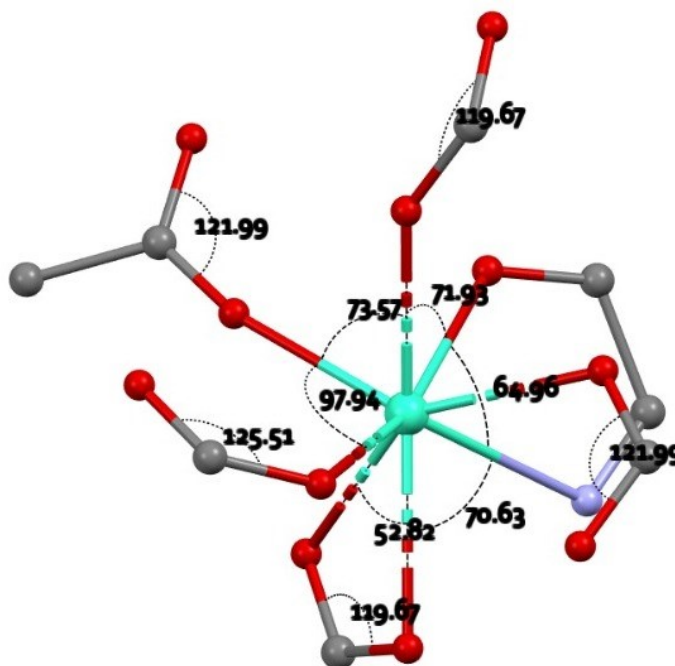

**Figure S5.** Environment of the terbium(III) ion in **1** showing the values of the O-Tb-O and O-Tb-N bond angles to illustrate their deviations from those of the ideal geometry.

**Table S4.** C-O bond lengths of  $\text{bttb}^{4-}$  in **1**.

| C-O bond                        | Bond length (Å) |
|---------------------------------|-----------------|
| C <sub>1</sub> -O <sub>1</sub>  | 1.288(4)        |
| C <sub>1</sub> -O <sub>2</sub>  | 1.198(5)        |
| C <sub>21</sub> -O <sub>3</sub> | 1.243(6)        |
| C <sub>21</sub> -O <sub>4</sub> | 1.244(6)        |
| C <sub>20</sub> -O <sub>5</sub> | 1.273(5)        |
| C <sub>20</sub> -O <sub>6</sub> | 1.242(5)        |

**Table S5.** Tb<sup>III</sup> <sup>5</sup>D<sub>4</sub> state lifetime (298 K,  $\lambda_{\text{exc}} = 320$  nm) calculated from the emission decay curves represented in Figure S7.

| Tb <sup>III</sup> <sup>5</sup> D <sub>4</sub> state lifetime (ms) | Average <sup>5</sup> D <sub>4</sub> state lifetime (ms) |
|-------------------------------------------------------------------|---------------------------------------------------------|
| $\tau_1 = 0.178$<br>$\tau_2 = 0.736$                              | $\tau_1 = 0.176$<br>$\tau_2 = 0.734$                    |
| $\tau_1 = 0.179$<br>$\tau_2 = 0.736$                              | <b>Standard deviation</b>                               |
| $\tau_1 = 0.172$<br>$\tau_2 = 0.732$                              | 0.003<br>0.002                                          |

**Table S6.** Tb<sup>III</sup> <sup>5</sup>D<sub>4</sub> state lifetime (77 K,  $\lambda_{\text{exc}} = 320$  nm) calculated from the emission decay curves represented in Figure S8.

| Tb <sup>III</sup> <sup>5</sup> D <sub>4</sub> state lifetime (ms) | Average <sup>5</sup> D <sub>4</sub> state lifetime (ms) |
|-------------------------------------------------------------------|---------------------------------------------------------|
| $\tau_1 = 0.172$<br>$\tau_2 = 0.689$                              | $\tau_1 = 0.174$<br>$\tau_2 = 0.690$                    |
| $\tau_1 = 0.181$<br>$\tau_2 = 0.696$                              | <b>Standard deviation</b>                               |
| $\tau_1 = 0.169$<br>$\tau_2 = 0.687$                              | 0.006<br>0.004                                          |

**Table S7.** Tb<sup>III</sup> <sup>5</sup>D<sub>4</sub> state ( $\lambda_{\text{exc}} = 320$  nm) and ligand in 400 nm ( $\lambda_{\text{exc}} = 335$  nm) time-dependent lifetime calculated from the emission decay curves represented in Figure S11.

| Temperature/ K | Time/ ms (Tb <sup>III</sup> <sub>545</sub> ) | Time/ ns (L <sub>400</sub> ) |
|----------------|----------------------------------------------|------------------------------|
| 10             | $\tau_1 = 0.67 \pm 0.026$                    | $\tau_1 = 0.269 \pm 0.01$    |
|                | $\tau_2 = 0.77 \pm 0.01$                     | $\tau_2 = 1.88 \pm 0.043$    |
| 20             | $\tau_1 = 0.719 \pm 0.077$                   | $\tau_1 = 0.269 \pm 0.0123$  |
|                | $\tau_2 = 0.756 \pm 0.005$                   | $\tau_1 = 2.15667 \pm 0.400$ |
| 40             | $\tau_1 = 0.769 \pm 0.075$                   | $\tau_1 = 0.235 \pm 0.014$   |
|                | $\tau_2 = 0.743 \pm 0.011$                   | $\tau_1 = 2.51333 \pm 0.547$ |
| 60             | $\tau_1 = 0.779 \pm 0.067$                   | $\tau_1 = 0.229 \pm 0.004$   |
|                | $\tau_2 = 0.736 \pm 0.005$                   | $\tau_2 = 2.58 \pm 0.566$    |
| 80             | $\tau_1 = 0.819 \pm 0.097$                   | $\tau_1 = 0.228 \pm 0.008$   |
|                | $\tau_2 = 0.733 \pm 0.005$                   | $\tau_2 = 3.11 \pm 1.045$    |
| 100            | $\tau_1 = 0.749 \pm 0.093$                   | $\tau_1 = 0.213 \pm 0.006$   |
|                | $\tau_2 = 0.726 \pm 0.005$                   | $\tau_2 = 2.443 \pm 0.560$   |
| 120            | $\tau_1 = 0.747 \pm 0.069$                   | $\tau_1 = 0.212 \pm 0.011$   |
|                | $\tau_2 = 0.726 \pm 0.005$                   | $\tau_2 = 2.443 \pm 0.490$   |
| 140            | $\tau_1 = 0.647 \pm 0.041$                   | $\tau_1 = 0.222 \pm 0.009$   |
|                | $\tau_2 = 0.73 \pm 0$                        | $\tau_2 = 1.92 \pm 0.144$    |
| 160            | $\tau_1 = 0.578 \pm 0.056$                   | $\tau_1 = 0.214 \pm 0.001$   |
|                | $\tau_2 = 0.72 \pm 0$                        | $\tau_2 = 1.75 \pm 0.166$    |
| 180            | $\tau_1 = 0.560 \pm 0.018$                   | $\tau_1 = 0.224 \pm 0.021$   |
|                | $\tau_2 = 0.723 \pm 0.011$                   | $\tau_2 = 1.713 \pm 0.066$   |
| 200            | $\tau_1 = 0.585 \pm 0.052$                   | $\tau_1 = 0.211 \pm 0.01$    |
|                | $\tau_2 = 0.716 \pm 0.005$                   | $\tau_2 = 1.81 \pm 0.185$    |
| 220            | $\tau_1 = 0.528 \pm 0.062$                   | $\tau_1 = 0.219 \pm 0.018$   |
|                | $\tau_2 = 0.72 \pm 0.01$                     | $\tau_2 = 1.64 \pm 0.165$    |
| 240            | $\tau_1 = 0.508 \pm 0.022$                   | $\tau_1 = 0.194 \pm 0.008$   |
|                | $\tau_2 = 0.706 \pm 0.004$                   | $\tau_2 = 1.61333 \pm 0.070$ |
| 260            | $\tau_1 = 0.524 \pm 0.053$                   | $\tau_1 = 0.193 \pm 0.003$   |
|                | $\tau_2 = 0.713 \pm 0.005$                   | $\tau_2 = 1.57333 \pm 0.023$ |
| 280            | $\tau_1 = 0.465 \pm 0.021$                   | $\tau_1 = 0.204 \pm 0.113$   |
|                | $\tau_2 = 0.736 \pm 0.005$                   | $\tau_2 = 1.51 \pm 0.079$    |
| 300            | $\tau_1 = 0.476 \pm 0.016$                   | $\tau_1 = 0.249 \pm 0.057$   |
|                | $\tau_2 = 0.74667 \pm 0.020$                 | $\tau_2 = 1.58 \pm 0.0556$   |
| 320            | $\tau_1 = 0.427 \pm 0.021$                   | $\tau_1 = 0.258 \pm 0.028$   |
|                | $\tau_2 = 0.723 \pm 0.011$                   | $\tau_2 = 1.44 \pm 0.0818$   |

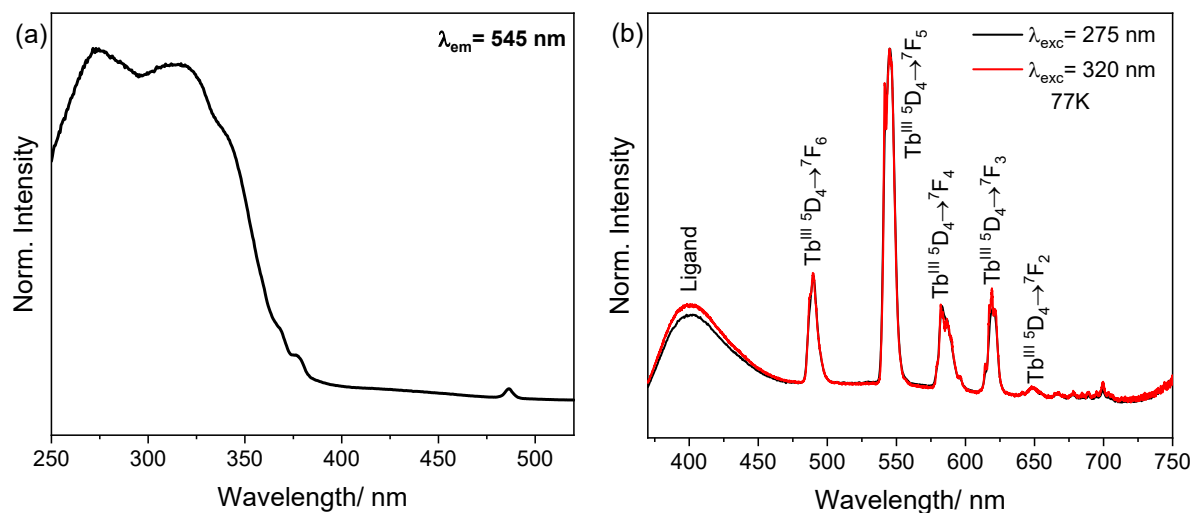

**Figure S6** (a) Excitation ( $\lambda_{\text{em}} = 545 \text{ nm}$ ) and (b) emission ( $\lambda_{\text{exc}} = 275$  and  $320 \text{ nm}$ ) spectra of **1** monitored at  $77 \text{ K}$ .

In addition, the data are shown in Tables S5 and S6 [Figures S7 and S8]) show the  $\text{Tb}^{\text{III}}$  lifetime emission of the  $^5\text{D}_4$  emitting state at two different temperatures ( $298 \text{ K}$  and  $77 \text{ K}$ ). The results illustrate that its luminescent properties stay prominent even through temperature variation.

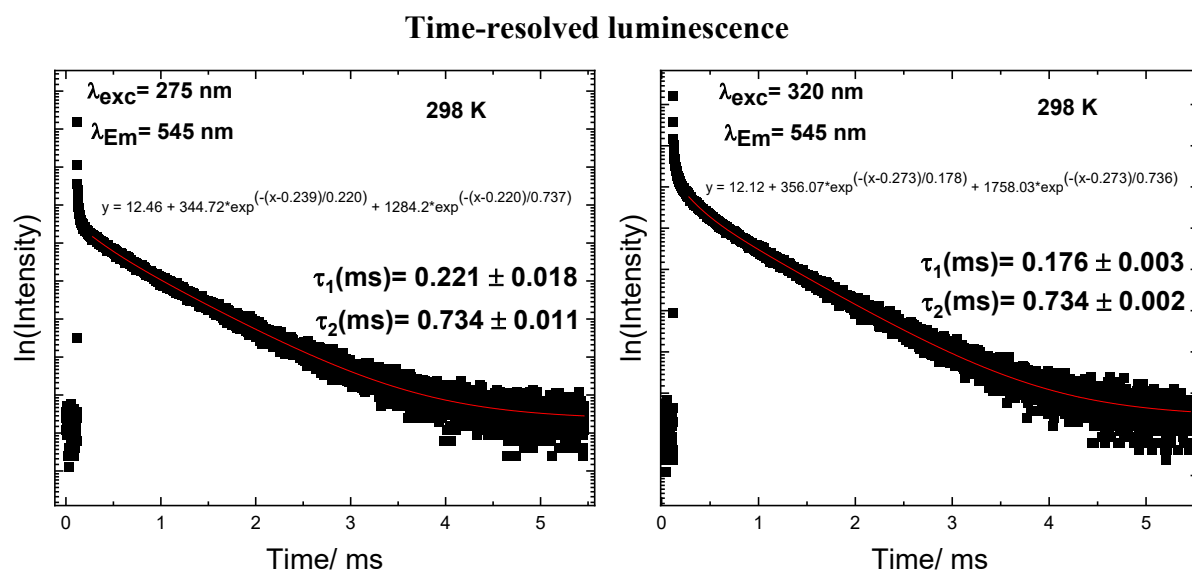

**Figure S7.** Intensity decay curves for **1** which were obtained with  $\lambda_{\text{exc}} = 275$  or  $320 \text{ nm}$  and,  $\lambda_{\text{em}} = 545 \text{ nm}$ , at  $298 \text{ K}$ .

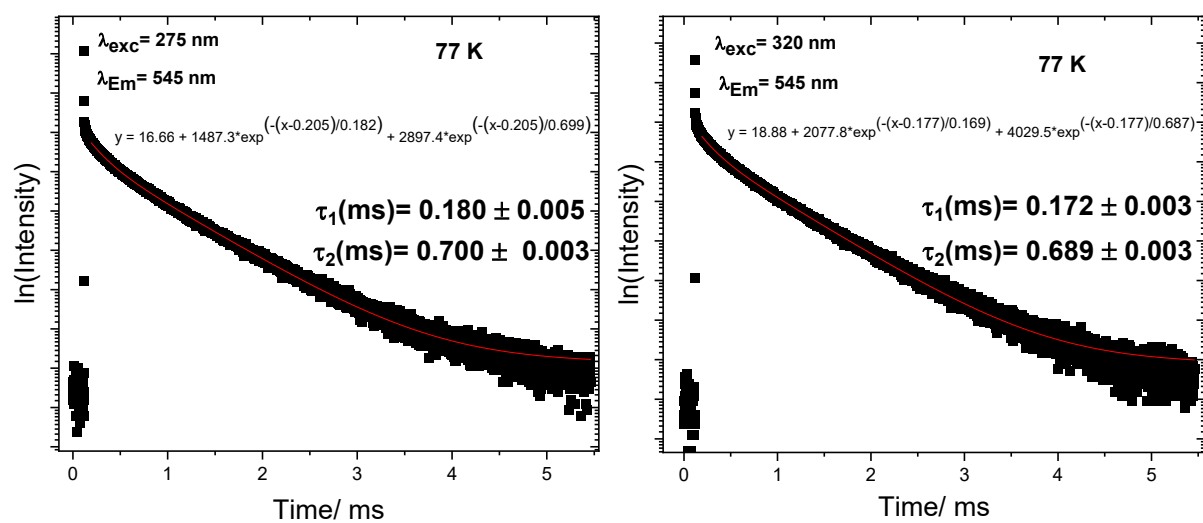

**Figure S8.** Intensity decay curves for **1** which were obtained with  $\lambda_{\text{exc}} = 275$  or  $320 \text{ nm}$  and  $\lambda_{\text{em}} = 545 \text{ nm}$  at  $77 \text{ K}$ .

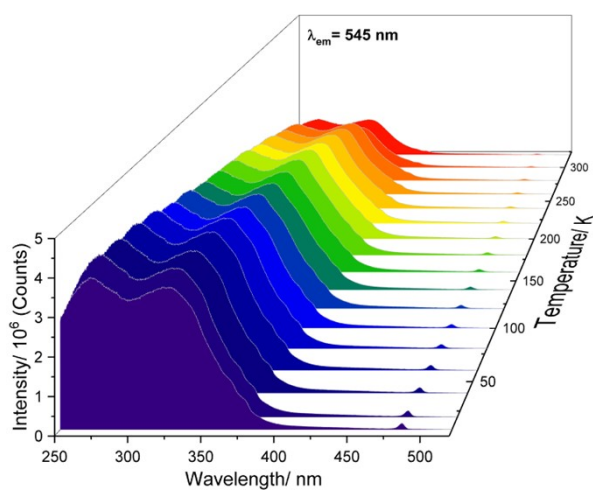

**Figure S9.** Excitation spectra of **1** at  $\lambda_{\text{em}} = 545 \text{ nm}$  for temperature-dependent luminescent.

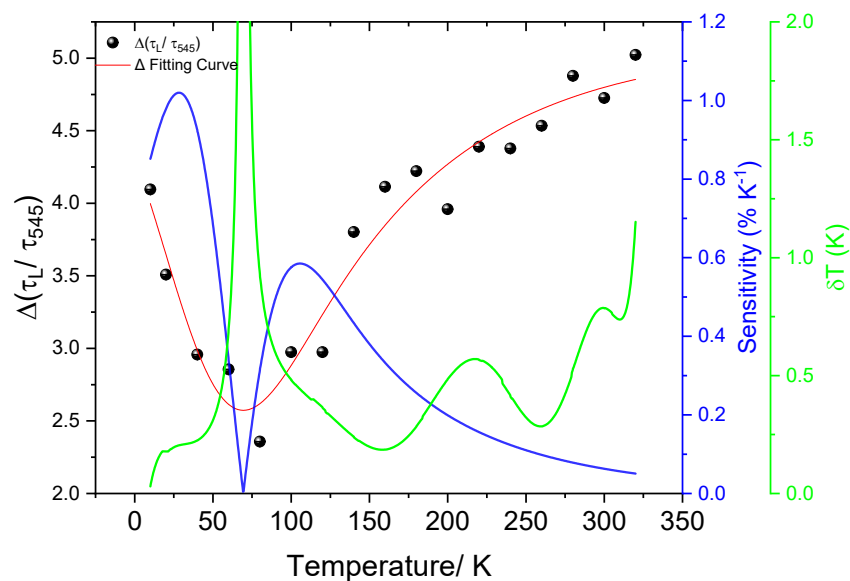

**Figure S10.** Temperature dependence of the thermometric parameter ( $\Delta$ ), relative thermal sensitivity ( $S_r$ ), and temperature uncertainty ( $\delta T$ ) by considering the thermometric parameter as  $\Delta\tau_{400(L)}/\tau_{545(Tb)}$  using their longer emission lifetimes.

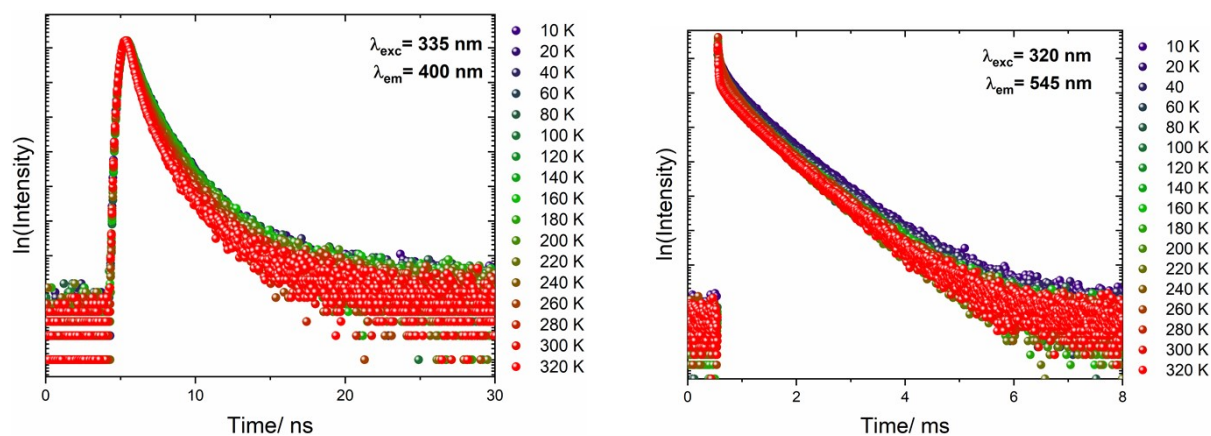

**Figure S11.** Emission decay curves of (a) the ligand at 400 nm and (b) the  $^5D_4$  state (monitoring  $^5D_4 \rightarrow ^7F_5$  at 545 nm) at temperatures below 320 K.

## REFERENCES

- (1) J. R. Karra, Y. G. Huang, K. S. Walton, *Cryst. Growth Des.* 2013, **13**, 1075–1081.
- (2) H. Jasuja, Y. Jiao, N. C. Burch, Y. G. Huang, K. S. Walton, *Langmuir* 2014, **30**, 14300–14307.
- (3) J. E. Warren, C. G. Perkins, K. E. P. Jelfs, P. Boldrin, P. A. Chater, G. J. Miller, T. D. Manning, M. E. Briggs, K. C. Stylianou, J. B. Claridge, M. J. Rosseinsky, *Angew. Chem., Int. Ed.* 2014, **53**, 4592–4596.
- (4) I. Burneo, K. C. Stylianou, S. Rodríguez-Hermida, J. X. Juanhuix, Fontrodona, I. Imaz, D. Maspoch, *Cryst. Growth Des.* 2015, **15**, 3182–3189.
- (5) X. Chen, A. M. Plonka, D. Banerjee, R. Krishna, H. T. Schaef, S. Ghose, P. K. Thallapally, J. B. Parise, *J. Am. Chem. Soc.* 2015, **137**, 22, 7007–7010.
- (6) Z. Guo, D. K. Panda, K. Maity, D. Lindsey, T.G. Parker, T. E. Albrecht-Schmitt, J. L. Barreda-Esparza, P. Xiong, W. Zhou, S. Saha, *J. Mater. Chem. C. Mater.* 2016, **4**, 894–899.
- (7) J. R. Karra, H. Jasuja, Y.G. Huang, K.S. Walton, *J. Mater. Chem. A. Mater.* 2015, **3**, 1624–1631.
- (8) W. Cheng, T. Wang, W. Xu, Y. Zhang, J. Zhang, M. Fang, *J. Coord. Chem.* 2016, **69**, 2220–2230.
- (9) M. Lammert, H. Reinsch, C.A. Murray, M.T. Wharmby, H. Terraschke, N. Stock, *Dalton Trans.* 2016, **45**, 18822–18826.
- (10) A. M. Plonka, X. Chen, H. Wang, R. Krishna, X. Dong, D. Banerjee, W. R. Woerner, Y. Han, J. Li, J. B. Parise, *Chem. Mat.* 2016, **28**, 1636–1646.
- (11) F. Yuan, C. Yuan, H. Hu, T. Wang, C. Zhou, *Polyhedron* 2018, **139**, 257–261.
- (12) R. G. Abdulhalim, P. M. Bhatt, Y. Belmabkhout, A. Shkurenko, K. Adil, L.J. Barbour, M. Eddaoudi, *J. Am. Chem. Soc.* 2017, **139**, 10715–10722.
- (13) M. Y. Tsang, S. Rodríguez-Hermida, K. C. Stylianou, F. Tan, D. Negi, F. Teixidor, C. Viñas, D. Choquesillo-Lazarte, C. Verdugo-Escamilla, M. Guerrero, J. Sort, J. Juanhuix, D. Maspoch, J. G. Planas, *Cryst. Growth Des.* 2017, **17**, 846–857.
- (14) F. Yuan, C. M. Yuan, H. M. Hu, T.T. Wang, C.S. Zhou, *Polyhedron* 2018, **139**, 257–261.
- (15) M. Köppen, V. Meyer, J. Ångström, A. K. Inge, N. Stock, *Cryst. Growth Des.* 2018, **18**, 4060–4067.
- (16) D. Banerjee, X. Chen, S.S. Lobanov, A.M. Plonka, X. Chan, J.A. Daly, T. Kim, P.K. Thallapally, J. B. Parise, *ACS Appl. Mater. Interfaces* 2018, **10**, 10622–10626.
- (17) S. S. Dhankhar, C.M. Nagaraja, *New J. Chem.* 2019, **43**, 2163–2170.
- (18) S. E. Gilson, P. Li, J. E. S. Szymanowski, J. White, D. Ray, L. Gagliardi, O.K. Farha, P. C. Burns, *J. Am. Chem. Soc.* 2019, **141**, 11842–11846.



- (19) P. Rönfeldt, H. Reinsch, M.P.M. Poschmann, H. Terraschke, N. Stock, *Cryst. Growth Des.* 2020, **20**, 4686–4694.
- (20) N. Dissem, M. Essalhi, N. Ferhi, A. Abidi, T. Maris, A. Duong, *Dalton Trans.* 2021, **50**, 8727–8735.
- (21) H.Q. Yin, K. Tan, S. Jensen, S. J. Teat, S. Ullah, X. Hei, E. Velasco, K. Oyekan, N. Meyer, X.Y. Wang, T. Thonhauser, X. B. Yin, J. Li, *Chem. Sci.* 2021, **12**, 14189–14197.
- (22) D. H. Le, R.P. Loughan, A. Gładysiak, N. Rampal, I. A. Brooks, A.H.A. Park, D. Fairen-Jimenez, K.C. Stylianou, *J. Mater. Chem. A Mater.* 2022, **10**, 1442–1450.
- (23) D. F. Sava Gallis, K.S. Butler, C. J. Pearce, N. Valdez, M. A. Rodriguez, *ACS Appl. Mater. Interfaces* 2022, **14**, 10566–10576.
- (24) B. C. Chen, C. Q. Xiao, J. J. Hu, Y. Peng, H. R. Wen, S. J. Liu, *Inorg. Chem.* 2023, **62**, 6255–6262.
- (25) J. Z. Gu, Z. Q. Gao, *J. Chem. Crystallogr.* 2012, **42**, 283–289.
- (26) Y. Pan, D. Ma, H. Liu, H. Wu, D. He, Y. Li, *J. Mater. Chem.* 2012, **22**, 10834–10839.
- (27) J. Cepeda, S. Pérez-Yáñez, G. Beobide, O. Castillo, J.Á. García, A. Luque, *Eur. J. Inorg. Chem.* 2015, **2015**, 4318–4328.
- (28) M. V. Marinho, D. O. Reis, W.X.C. Oliveira, L.F. Marques, H.O. Stumpf, M. Déniz, J. Pasán, C. Ruiz-Pérez, J. Cano, F. Lloret, M. Julve. *Inorg. Chem.* 2017, **56**, 2108–2123.
- (29) M. O. Barsukova, S. V. Cherezova, A.A. Sapijanik, O. V. Lundovskaya, D. G. Samsonenko, V.P. Fedin, *RSC Adv.* 2020, **10**, 38252–38259.
- (30) M. Llunell, D. Casanova, J. Cirera, P. Alemany, S. Alvarez, SHAPE: Program for the Stereochemical Analysis of Molecular Fragments by Means of Continuous Shape Measures and Associated Tools, v2.1, Electronic Structure Group, Universitat de Barcelona. 2013.
- (31) S. Alvarez, M. Llunell, *J. Chem. Soc., Dalton Trans.* 2000, 3288–3303.
- (32) S. Biswas, S. Das, J. Acharya, V. Kumar, J. van Leusen, P. Kögerler, J.M. Herrera, E. Colacio, V. Chandrasekhar, *Chem. - A Eur. J.* 2017, **23**, 5154–5170.
